# Supplementary material
Source: PubMed Central journal article supplement (PMC2834857)
Supplement: NIHMS119987-supplement-03.pdf [file NIHMS119987-supplement-03.pdf]

**Discriminant Analysis**

Discriminant Method: Linear

**Canonical Plot**

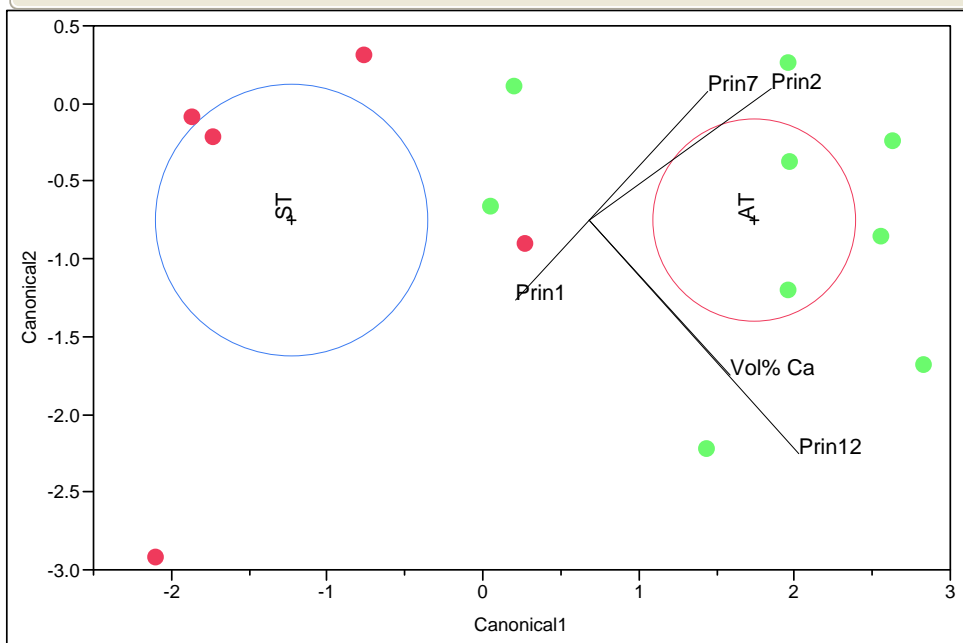

**Canonical**

| Eigenvalue | Percent  | Cum Percent | Corr       |
|------------|----------|-------------|------------|
| 2.36369211 | 100.0000 | 100.0000    | 0.83827658 |
| 4.4409e-16 | 0.0000   | 100.0000    | 0          |
| 1.129e-16  | 0.0000   | 100.0000    | 0          |
| 2.8332e-17 | 0.0000   | 100.0000    | 0          |
| -2.674e-17 | 0.0000   | 100.0000    | 0          |

| Test             | Value     | Exact F | NumDF | DenDF | Prob>F  |
|------------------|-----------|---------|-------|-------|---------|
| Wilks' Lambda    | 0.2972924 | 3.7819  | 5     | 8     | 0.0470* |
| Pillai's Trace   | 0.7027076 | 3.7819  | 5     | 8     | 0.0470* |
| Hotelling-Lawley | 2.3636921 | 3.7819  | 5     | 8     | 0.0470* |
| Roy's Max Root   | 2.3636921 | 3.7819  | 5     | 8     | 0.0470* |

Within Matrix

Between Matrix

Eigenvectors

|        | Vol% Ca   | Prin1     | Prin2     | Prin7     | Prin12    |
|--------|-----------|-----------|-----------|-----------|-----------|
| Canon1 | 0.0414851 | -0.107398 | 0.4529266 | 0.6643445 | 2.4678829 |
| Canon2 | -0.045685 | -0.117093 | 0.3278663 | 0.7226683 | -2.754443 |
| Canon3 | -0.080141 | -0.04883  | 0.2978744 | 0.9187885 | 0         |
| Canon4 | 0.0193141 | 0.2300781 | -0.190571 | 0.673928  | 0         |
| Canon5 | 0.0098243 | 0.246382  | 0.2320707 | -0.595576 | 0         |

Scoring Coefs

**Discriminant Analysis**

**Discriminant Scores**

Number Misclassified 3  
 Percent Misclassified 21.43  
 -2LogLikelihood 2.626

| Row | Actual | SqDist(Actual) | Prob(Actual) | -Log(Prob) |   | Predicted | Prob(Pred) | Others |
|-----|--------|----------------|--------------|------------|---|-----------|------------|--------|
| 1   | AT     | 3.551297       | 0.9995       | 0.000      |   | AT        | 0.9995     |        |
| 2   | AT     | 5.066475       | 0.4658       | 0.764      | ■ | * ST      | 0.5342     |        |
| 3   | AT     | 2.380469       | 0.9940       | 0.006      |   | AT        | 0.9940     |        |
| 4   | AT     | 3.731855       | 0.9716       | 0.029      |   | AT        | 0.9716     |        |
| 5   | AT     | 7.327743       | 0.3573       | 1.029      | ■ | * ST      | 0.6427     |        |
| 6   | AT     | 5.875369       | 0.9939       | 0.006      |   | AT        | 0.9939     |        |
| 7   | AT     | 0.977726       | 0.9990       | 0.001      |   | AT        | 0.9990     |        |
| 8   | AT     | 3.516157       | 0.9939       | 0.006      |   | AT        | 0.9939     |        |
| 9   | AT     | 7.157939       | 0.9992       | 0.001      |   | AT        | 0.9992     |        |
| 10  | ST     | 7.286889       | 0.9991       | 0.001      |   | ST        | 0.9991     |        |
| 11  | ST     | 3.126712       | 0.9972       | 0.003      |   | ST        | 0.9972     |        |
| 12  | ST     | 4.181525       | 0.9981       | 0.002      |   | ST        | 0.9981     |        |
| 13  | ST     | 1.515780       | 0.9525       | 0.049      |   | ST        | 0.9525     |        |
| 14  | ST     | 4.304064       | 0.4822       | 0.729      | ■ | * AT      | 0.5178     |        |
| 15  |        | .              | .            | .          |   |           | .          |        |
| 16  |        | .              | .            | .          |   |           | .          |        |
| 17  |        | .              | .            | .          |   |           | .          |        |
| 18  |        | .              | .            | .          |   |           | .          |        |
| 19  |        | .              | .            | .          |   |           | .          |        |
| 20  |        | .              | .            | .          |   |           | .          |        |
| 21  |        | .              | .            | .          |   |           | .          |        |

\* indicates misclassified

Counts: Actual Rows by Predicted Columns

|    | AT | ST |
|----|----|----|
| AT | 7  | 2  |
| ST | 1  | 4  |

**Discriminant Analysis**

Discriminant Method: Linear

**Canonical Plot**

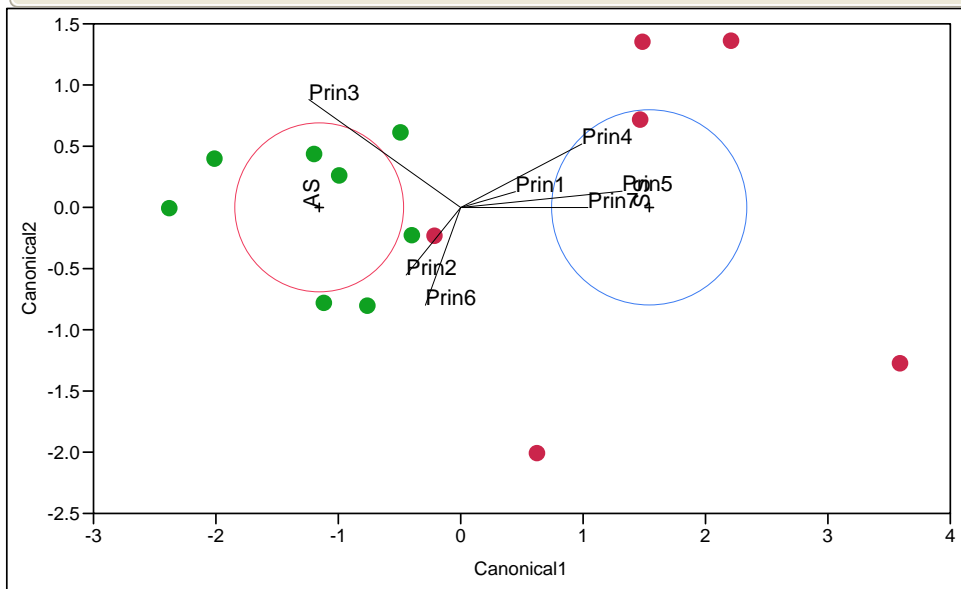

| Canonical  |          |             |            |
|------------|----------|-------------|------------|
| Eigenvalue | Percent  | Cum Percent | Corr       |
| 2.07651024 | 100.0000 | 100.0000    | 0.82155729 |
| 8.7544e-17 | 0.0000   | 100.0000    | 0          |
| 7.8664e-18 | 0.0000   | 100.0000    | 0          |
| -1.361e-17 | 0.0000   | 100.0000    | 0          |
| -1.012e-16 | 0.0000   | 100.0000    | 0          |
| -1.367e-16 | 0.0000   | 100.0000    | 0          |
| -4.441e-16 | 0.0000   | 100.0000    | 0          |

| Test             | Value     | Exact F | NumDF | DenDF | Prob>F |
|------------------|-----------|---------|-------|-------|--------|
| Wilks' Lambda    | 0.3250436 | 1.7799  | 7     | 6     | 0.2498 |
| Pillai's Trace   | 0.6749564 | 1.7799  | 7     | 6     | 0.2498 |
| Hotelling-Lawley | 2.0765102 | 1.7799  | 7     | 6     | 0.2498 |
| Roy's Max Root   | 2.0765102 | 1.7799  | 7     | 6     | 0.2498 |

Within Matrix  
Between Matrix

| Eigenvectors |           |           |           |           |           |           |           |
|--------------|-----------|-----------|-----------|-----------|-----------|-----------|-----------|
|              | Prin1     | Prin2     | Prin3     | Prin4     | Prin5     | Prin6     | Prin7     |
| Canon1       | 0.1046359 | -0.141437 | -0.568223 | 0.4785507 | 0.8269166 | -0.181283 | 0.7269402 |
| Canon2       | 0.0302397 | -0.174919 | 0.4040574 | 0.250626  | 0.0834898 | -0.500473 | 0         |
| Canon3       | 0.3218577 | -0.026238 | -0.029265 | -0.221559 | -0.113626 | -0.106848 | 0         |
| Canon4       | 0.0638758 | 0.4192009 | 0.1180265 | 0.2231719 | 0.1157193 | -0.101369 | 0         |
| Canon5       | 0.0729278 | -0.069835 | -0.010086 | 0.4601977 | -0.416916 | 0.4504943 | 0         |
| Canon6       | 0.049307  | -0.042678 | 0.281506  | -0.07833  | 0.464143  | 0.6213593 | 0         |
| Canon7       | -0.027668 | 0.037399  | 0.1502502 | -0.126539 | -0.218654 | 0.0479352 | 0.8936017 |

Scoring Coefs

**Discriminant Scores**

|                       |       |
|-----------------------|-------|
| Number Misclassified  | 1     |
| Percent Misclassified | 7.143 |
| -2LogLikelihood       | 2.203 |

| Row | Actual | SqDist(Actual) | Prob(Actual) | -Log(Prob) | Predicted | Prob(Pred) | Others  |
|-----|--------|----------------|--------------|------------|-----------|------------|---------|
| 1   | AS     | 9.590996       | 0.9592       | 0.042      | AS        | 0.9592     |         |
| 2   | AS     | 5.668975       | 0.9267       | 0.076      | AS        | 0.9267     |         |
| 3   | AS     | 5.324856       | 0.9761       | 0.024      | AS        | 0.9761     |         |
| 4   | AS     | 5.317731       | 0.9990       | 0.001      | AS        | 0.9990     |         |
| 5   | AS     | 5.600641       | 0.8260       | 0.191      | AS        | 0.8260     | SS 0.17 |
| 6   | AS     | 4.979894       | 0.9973       | 0.003      | AS        | 0.9973     |         |
| 7   | AS     | 5.980430       | 0.8591       | 0.152      | AS        | 0.8591     | SS 0.14 |
| 8   | AS     | 1.771235       | 0.9706       | 0.030      | AS        | 0.9706     |         |
| 9   | SS     | 5.946345       | 0.7684       | 0.263      | SS        | 0.7684     | AS 0.23 |
| 10  | SS     | 9.156324       | 0.9999       | 0.000      | SS        | 0.9999     |         |
| 11  | SS     | 5.611729       | 0.2575       | 1.357      | * AS      | 0.7425     |         |
| 12  | SS     | 8.790168       | 0.9713       | 0.029      | SS        | 0.9713     |         |
| 13  | SS     | 2.672862       | 0.9699       | 0.031      | SS        | 0.9699     |         |
| 14  | SS     | 7.587815       | 0.9958       | 0.004      | SS        | 0.9958     |         |

\* indicates misclassified

Counts: Actual Rows by Predicted Columns

|    | AS | SS |
|----|----|----|
| AS | 8  | 0  |
| SS | 1  | 5  |
